# Supplementary material
Source: publisher figshare collection journal article supplement (https://diabetesjournals.figshare.com/ndownloader/files/26733047)
Supplement: Supplementary file 1 [file 26733047]

Appendix Table  
Characteristics of Patients with Type 2 Diabetes Mellitus

|                                              | All            | SGLT2i as preferred agent[2] | GLP1-RA as preferred agent[3] | Either agent recommended[4] | No comorbid conditions[5] |
|----------------------------------------------|----------------|------------------------------|-------------------------------|-----------------------------|---------------------------|
| <b>Demographic Characteristics</b>           |                |                              |                               |                             |                           |
| Number                                       | 13,350         | 1,788 (13.4%)                | 226 (1.7%)                    | 2,421 (18.1%)               | 8,415 (63.0%)             |
| Age, years                                   | 65.2±13.2      | 69.8±11.5                    | 74.3±11.6                     | 71.1±11.3                   | 61.6±12.8                 |
| Female                                       | 6,274 (47.0%)  | 721 (40.3%)                  | 118 (52.2%)                   | 1,241 (51.3%)               | 4,000 (47.5%)             |
| Self-identified Race                         |                |                              |                               |                             |                           |
| Black                                        | 1,652 (12.4%)  | 152 (8.5%)                   | 22 (9.7%)                     | 221 (9.1%)                  | 1229 (14.6%)              |
| Hispanic                                     | 1,326 (9.9%)   | 70 (3.9%)                    | 17 (7.5%)                     | 143 (5.9%)                  | 1078 (12.8%)              |
| Other                                        | 372 (2.8%)     | 20 (1.1%)                    | 6 (2.7%)                      | 33 (1.4%)                   | 306 (3.6%)                |
| White                                        | 8,857 (66.3%)  | 1473 (82.4%)                 | 168 (74.3%)                   | 1910 (78.9%)                | 4873 (57.9%)              |
| Asian                                        | 1,075 (8.1%)   | 67 (3.7%)                    | 13 (5.8%)                     | 101 (4.2%)                  | 880 (10.5%)               |
| Unknown                                      | 68 (0.5%)      | 6 (0.3%)                     | 0 (0%)                        | 13 (0.5%)                   | 49 (0.6%)                 |
| <b>Comorbid Conditions and Health Status</b> |                |                              |                               |                             |                           |
| Charlson comorbidity score                   | 4.8±2.9        | 5.8±3.0                      | 8.2±2.8                       | 5.7±3.0                     | 4.1±2.5                   |
| Hypertension                                 | 10,579 (79.2%) | 1,679 (93.9%)                | 193 (85.4%)                   | 2,181 (90.1%)               | 6,060 (72.0%)             |
| Heart Failure                                | 1,639 (12.3%)  | 1,239 (69.3%)                | 29 (12.8%)                    | 0 (0%)                      | 0 (0%)                    |
| Chronic Kidney Disease                       | 3,067 (23.0%)  | 895 (50.1%)                  | 225 (99.6%)                   | 1,455 (60.1%)               | 0 (0%)                    |
| Atherosclerotic Cardiovascular Disease       | 2,955 (22.1%)  | 1,300 (72.7%)                | 59 (26.1%)                    | 1,201 (49.6%)               | 0 (0%)                    |
| Coronary Artery Disease                      | 2,949 (22.1%)  | 1,294 (72.4%)                | 59 (26.1%)                    | 1,201 (49.6%)               | 0 (0%)                    |
| Cerebrovascular Disease                      | 1,121 (8.4%)   | 722 (40.4%)                  | 15 (6.6%)                     | 12 (0.5%)                   | 0 (0%)                    |
| Peripheral Vascular Disease                  | 1,231 (9.2%)   | 821 (45.9%)                  | 19 (8.4%)                     | 17 (0.7%)                   | 0 (0%)                    |
| Pancreatitis                                 | 694 (5.2%)     | 321 (18.0%)                  | 0 (0%)                        | 3 (0.1%)                    | 0 (0%)                    |
| Treated with Statin                          | 8,964 (67.1%)  | 1,173 (65.6%)                | 182 (80.5%)                   | 1,834 (75.8%)               | 5,678 (67.5%)             |
| Treatment with Ace inhibitor or ARB          | 8,754 (65.6%)  | 1,285 (71.9%)                | 143 (63.3%)                   | 1,786 (73.8%)               | 5,284 (62.8%)             |
| Recent Blood Pressure (mmHg)                 | 130.6/73.9     | 132.1/72.8                   | 134.6/69.6                    | 131.6/72.8                  | 129.8/74.9                |
| Body Mass Index (kg/m <sup>2</sup> )         | 31.9±6.7       | 32.1±6.9                     | 32.6±7.0                      | 32.4±6.6                    | 31.8±6.7                  |
| <25                                          | 1,677 (12.6%)  | 240 (13.4%)                  | 28 (12.4%)                    | 270 (11.2%)                 | 1,066 (12.7%)             |
| 25-30                                        | 3,901 (29.2%)  | 503 (28.1%)                  | 62 (27.4%)                    | 682 (28.2%)                 | 2,496 (29.7%)             |
| 30-35                                        | 3,801 (28.5%)  | 533 (29.8%)                  | 60 (26.5%)                    | 703 (29.0%)                 | 2,360 (28.0%)             |
| 35-40                                        | 2,115 (15.8%)  | 307 (17.2%)                  | 38 (16.8%)                    | 437 (18.1%)                 | 1,257 (14.9%)             |
| >40                                          | 1,443 (10.8%)  | 192 (10.7%)                  | 32 (14.2%)                    | 306 (12.6%)                 | 872 (10.4%)               |
| Missing                                      | 413 (3.1%)     | 13 (0.7%)                    | 6 (2.7%)                      | 23 (1.0%)                   | 364 (4.3%)                |
| Recent LDL (mg/dL)                           | 84.9±33.2      | 80.8±32.6                    | 75.6±32.7                     | 80.9±31.3                   | 87.8±33.7                 |
| eGFR (ml/min/1.73m <sup>2</sup> ) [1]        |                |                              |                               |                             |                           |
| >60                                          | 10,075 (75.5%) | 1,151 (64.4%)                | 0 (0.0%)                      | 985 (40.7%)                 | 7,939 (94.3%)             |
| 45-60                                        | 1,620 (12.1%)  | 377 (21.1%)                  | 0 (0.0%)                      | 917 (37.9%)                 | 326 (3.9%)                |
| 30-44                                        | 808 (6.1%)     | 252 (14.1%)                  | 0 (0.0%)                      | 512 (21.1%)                 | 44 (0.5%)                 |
| 15-29                                        | 249 (1.9%)     | 0 (0.0%)                     | 226 (100.0%)                  | 1 (0.0%)                    | 12 (0.1%)                 |
| <15                                          | 136 (1.0%)     | 0 (0.0%)                     | 0 (0.0%)                      | 0 (0.0%)                    | 0 (0.0%)                  |
| Kidney Failure                               | 353 (2.6%)     | 0 (0.0%)                     | 0 (0.0%)                      | 0 (0.0%)                    | 0 (0.0%)                  |
| Urine Albumin-to-Creatinine Ratio            |                |                              |                               |                             |                           |
| <30 mg/dL                                    | 7,591 (56.9%)  | 630 (35.2%)                  | 23 (10.2%)                    | 1,252 (51.7%)               | 5,516 (65.5%)             |
| 30 - 300 mg/dL                               | 2,453 (18.4%)  | 257 (14.4%)                  | 70 (31.0%)                    | 720 (29.7%)                 | 1,316 (15.6%)             |
| >300 mg/dL                                   | 788 (5.9%)     | 614 (34.3%)                  | 94 (41.6%)                    | 0 (0.0%)                    | 0 (0.0%)                  |
| Missing                                      | 2,518 (18.9%)  | 287 (16.1%)                  | 39 (17.3%)                    | 449 (18.5%)                 | 1,583 (18.8%)             |
| Hemoglobin A1c                               |                |                              |                               |                             |                           |
| <7% (<8.6 mmol/L)                            | 6,916 (51.8%)  | 894 (50.0%)                  | 115 (50.9%)                   | 1,301 (53.7%)               | 4,299 (51.1%)             |
| 7- 8% (8.6 - 10.1 mmol/L)                    | 3,114 (23.3%)  | 407 (22.8%)                  | 51 (22.6%)                    | 587 (24.2%)                 | 1,957 (23.3%)             |
| 8-9% (10.1 - 11.7 mmol/L)                    | 1,544 (11.6%)  | 215 (12.0%)                  | 37 (16.4%)                    | 273 (11.3%)                 | 971 (11.5%)               |
| >9% (>11.7 mmol/L)                           | 1,658 (12.4%)  | 258 (14.4%)                  | 23 (10.2%)                    | 249 (10.3%)                 | 1,099 (13.1%)             |
| Missing                                      | 118 (0.9%)     | 14 (0.8%)                    | 0 (0.0%)                      | 11 (0.5%)                   | 89 (1.1%)                 |

Numeric variables shown as mean ± standard deviation. Categorical variables displayed as count (percent of total).

[1] eGFR is estimated GFR calculated by the abbreviated MDRD equation:

$$186 \times (\text{Creatinine}/88.4) - 1.154 \times (\text{Age}) - 0.203 \times (0.742 \text{ if female}) \times (1.210 \text{ if Black})$$

[2] Patients with diagnosis of HF, eGFR >30 ml/min/1.73m<sup>2</sup> or diagnosis of CKD with urinary albumin to creatinine ratio (UACR) >300 mg/g.

[3] Patients with a history of HF or CKD with eGFR less than 30 and greater than 14 ml/min/1.73m<sup>2</sup> and without history of pancreatitis.

[4] Patients without diagnosis of HF, with diagnosis of CKD and with UACR 30-300 mg/g, or diagnosis of ASCVD.

[5] Patients without diagnosis of HF, CKD, or ASCVD.
